# Supplementary material
Source: publisher figshare collection journal article supplement (https://karger.figshare.com/ndownloader/files/27775257)
Supplement: Supplementary file 1 [file 27775257]

**Supplementary Table 2: Inter-tumour comparison of quantitative MR parameters, granulation status and biochemical remission status post-surgical resection in somatotropinoma by qualitative T2W signal intensity evaluation**

SI= signal intensity

*P value calculated using 2-tailed t-test or Mann-Whitney U test in the case of non - parametric data (e.g. tumour size)*. For *differences in tumour granulation status and biochemical remission, p value determined using Fisher’s exact test (*).*

| **Parameter**  Within group mean (+/ - S.D) | | **T2 hyperintense**  **(n=14)** | **T2 hypointense**  **(n=24)** | **P value** |
| --- | --- | --- | --- | --- |
| **Median Tumour size cm3**  **(IQR)** | | 3.15  (0.63 – 7.38) | 0.68  (0.41 – 1.27) | 0.02 |
| **Tumour/WM**  **T2W SI ratio** | | 1.31  (0.18) | 0.95  (0.17) | <0.001 |
| **Tumour/WM**  **T1W SI ratio** | | 1.00  (0.19) | 1.01  (0.09) | 0.89 |
| **Tumour/CSF**  **T2W SI ratio** | | 0.45  (0.08) | 0.32  (0.05) | <0.001 |
| **Tumour/CSF**  **T1W SI ratio** | | 2.47  (0.52) | 2.51  (0.30) | 0.77 |
| **Tumour T2/T1**  **SIRatio - WM** | | 1.36  (0.32) | 0.95  (0.19) | <0.001 |
| **Tumour T2/T1**  **SIRatio - CSF** | | 0.19  (0.04) | 0.13  (0.02) | <0.001 |
| **Granulation**  **Subtype** | Sparsely | 7 (50%) | 0 (0%) | <0.001* |
| Densely/intermediate | 7 (50%) | 24 (100%) |
| **Biochemical remission** | No remission | 5 (36%) | 7 (29%) | 0.73* |
| Remission | 9 (64%) | 17 (71%) |
